# Supplementary material
Source: PubMed Central journal article supplement (PMC7003502)
Supplement: ao9b03840_si_001.pdf [file ao9b03840_si_001.pdf]

## Supplementary File

# ENHANCED ANTIMICROBIAL ACTIVITY OF BIOFUNCTIONALIZED ZIRCONIA NANOPARTICLES

Mujeeb Khan<sup>\*1</sup>, Mohammed Rafi Shaik<sup>1</sup>, Shams Tabrez Khan<sup>2</sup>, Syed Farooq Adil<sup>1</sup>, Mufsir Kuniyil<sup>3</sup>, Majad Khan<sup>4</sup>, Abdulrahman A. Al-Warthan<sup>1</sup>, Mohammed Rafiq H Siddiqui<sup>1</sup>, and Muhammad Nawaz Tahir<sup>\*4</sup>

<sup>1</sup>Department of Chemistry, College of Science, King Saud University, P.O. 2455, Riyadh 11451, Kingdom of Saudi Arabia.

<sup>2</sup>Department of Agricultural Microbiology, Faculty of Agriculture, Aligarh Muslim University, Aligarh, UP, 202002, India

<sup>3</sup>Department of Chemistry, Koneru Lakshmaiah Education Foundation, Vaddeswaram, Guntur 522502, Andhra Pradesh, India

<sup>4</sup>Chemistry Department, King Fahd University of Petroleum & Minerals, Dhahran, 31261, Kingdom of Saudi Arabia.

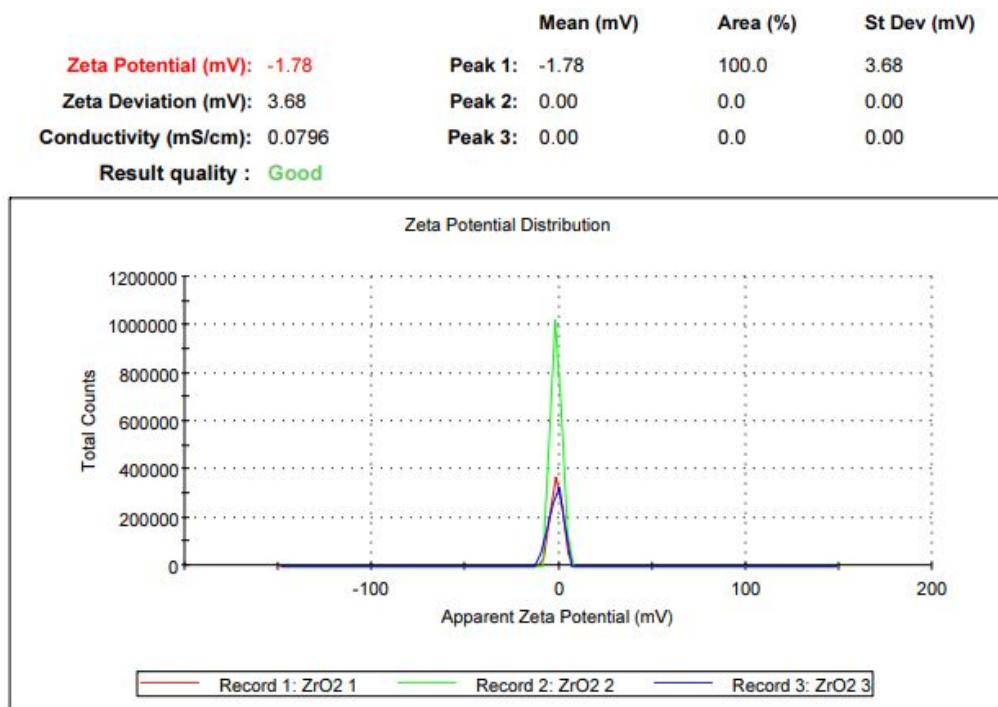

Figure S1: zeta potential plots of ZrO<sub>2</sub>

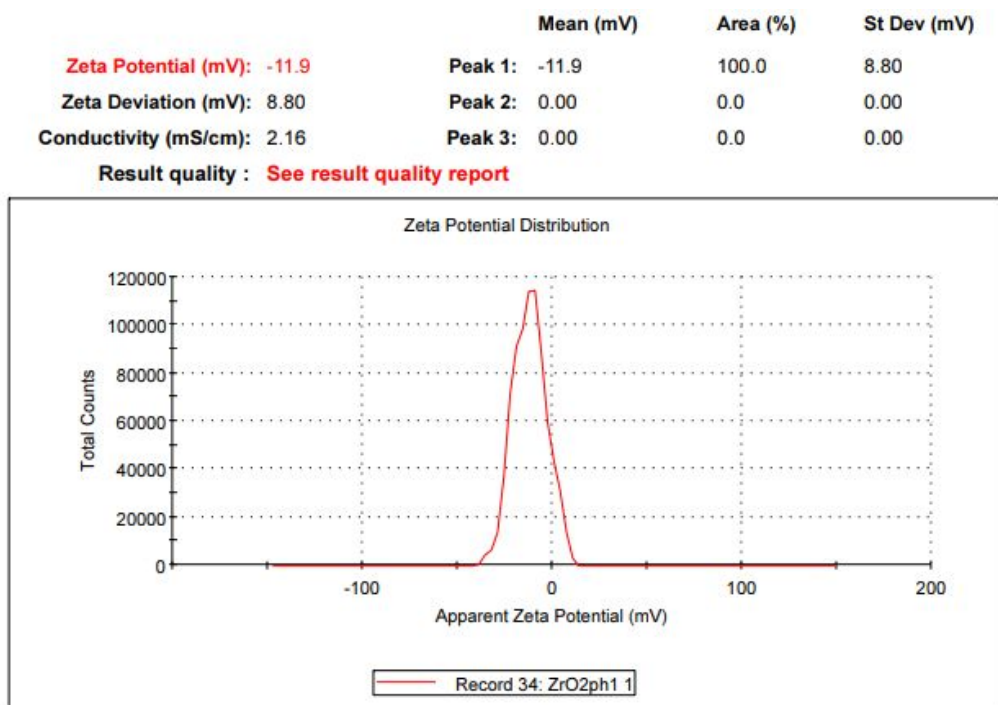

Figure S2: Zeta potential plots of ZrO<sub>2</sub> at pH 8

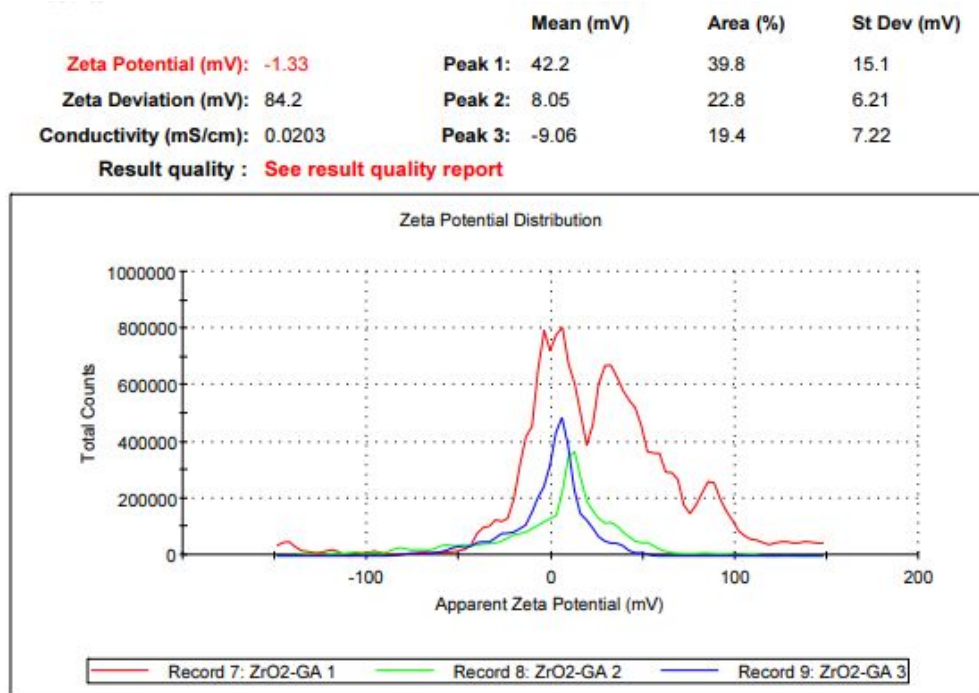

Figure S3: Zeta potential plots of GA-ZrO<sub>2</sub>

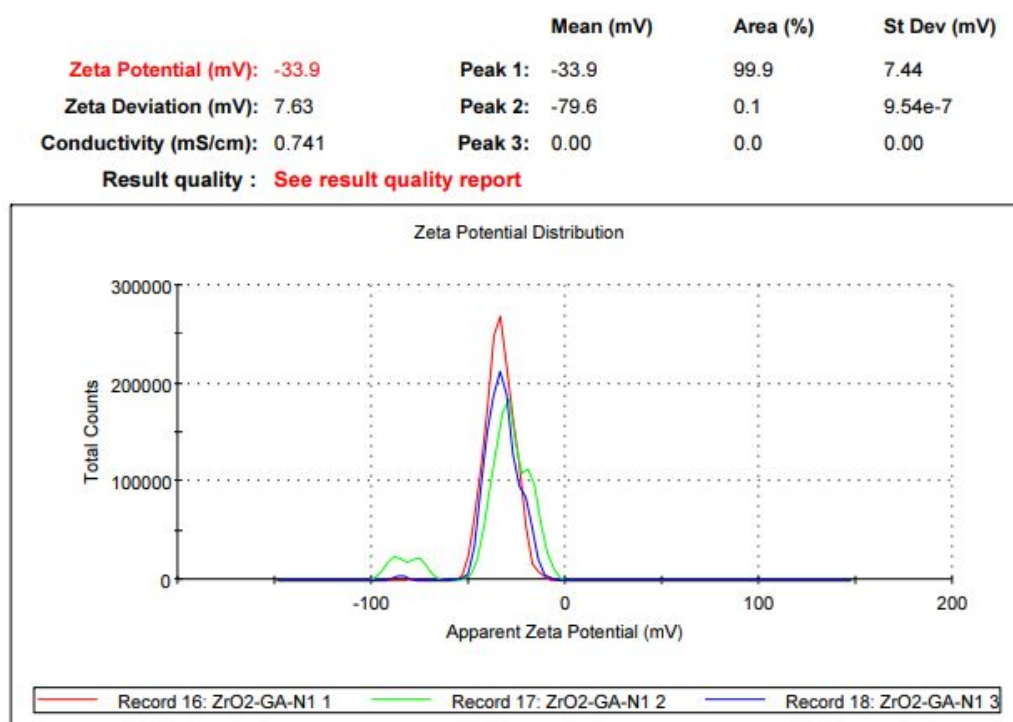

Figure S4: Zeta potential plots of GA-ZrO<sub>2</sub> at pH 8

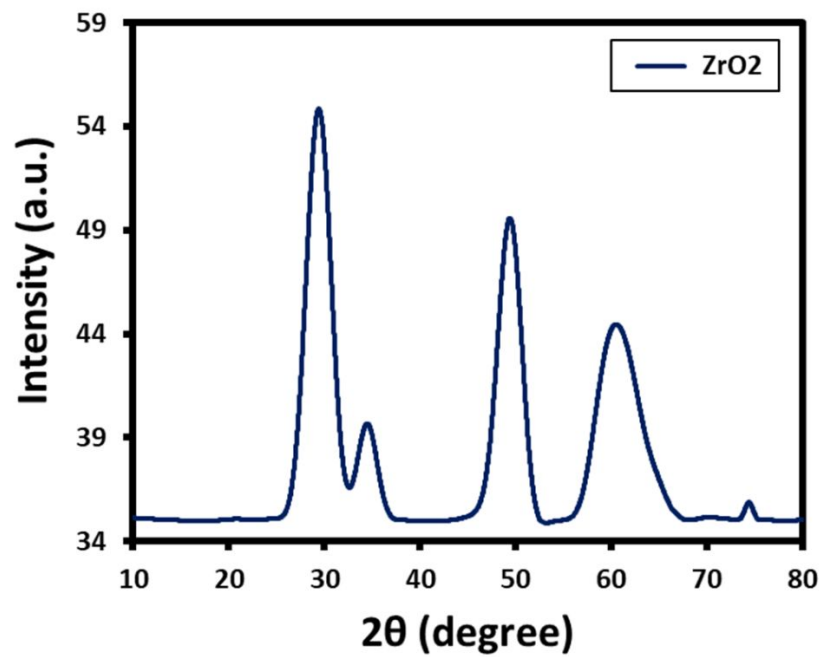

Figure S5: XRD pattern of ZrO<sub>2</sub>

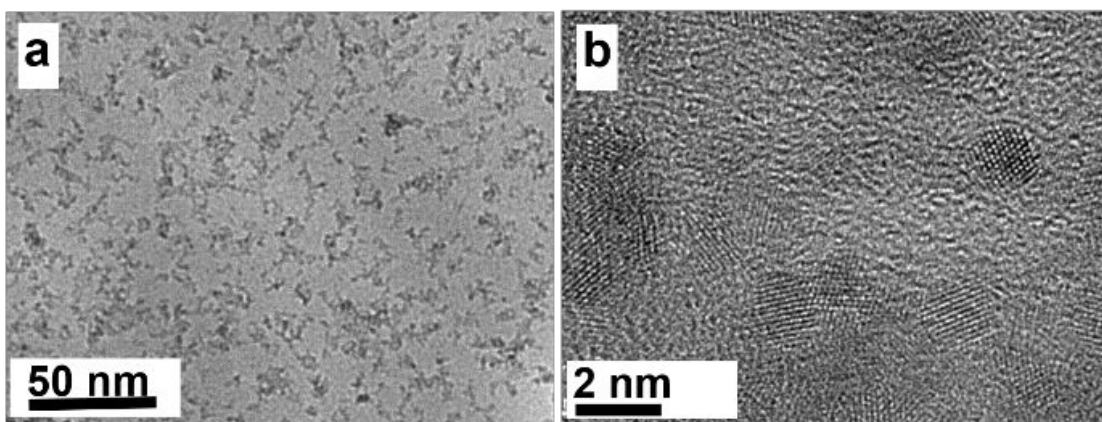

Figure S6: TEM images of pure ZrO<sub>2</sub> NPs (a,b) different resolution.
